# Supplementary material
Source: publisher site journal article supplement (https://www.dovepress.com/get_supplementary_file.php?f=216219.docx)
Supplement: Supplementary file 1 [file get_supplementary_file.php]

**Supplemental Table 1.** Study sites

| 01 – Shoals Medical Trials, Inc., 1300 S Montgomery Ave, Sheffield, AL 35660, USA  05 – Hermann Drive Surgical Hospital, 2001 Hermann Dr, Houston, TX 77004, USA  07 – Comprehensive Res Inst LLC., 353 New Shackle Island Rd, Suite B-122, Hendersonville, TN 37075, USA  09 – University Orthopedics Center, 1505 9th Ave, Altoona, PA 16602, USA  10 – Cleveland Clinic ‒ Fairview, 18101 Lorain Ave, Cleveland, OH 44111, USA  11 – Ohio State Univ Wexner Medical Center, 410 W 10th Ave, Columbus, OH 43210, USA  13 – Trovare Clinical Research, 9300 Stockdale Highway, Suite 400, Bakersfield, CA 93311, USA  15 – Jackson Memorial Hospital, 1611 NW 12th Ave, C-300, Miami, FL 33136, USA  16 – Great Falls Clinic LLP, 3000 15th Ave S, Great Falls, MT 59405, USA  17 – Tampa General Hospital, 1 Tampa General Circle, Suite F145, Tampa, FL 33606, USA  18 – Drug Research and Anlysis Corp, 1758 Park Place, Suite 200, Montgomery, AL 36106, USA  19 – Drug Research and Anlysis Corp, 1758 Park Place, Suite 200, Montgomery, AL 36106, USA  20 – Shoals Clinical Research Associates, 205 Marengo St, Florence, AL 35630, USA  21 – Rush Univ Medical Ctr, 1653 W Congress Parkway, Jelke 1489, Chicago, IL 60612, USA  22 – Maisonneuve-Rosemont Hosp, 5415 Blvd de L'Assomption, Montreal, QC, H1T 2M4, Canada  23 – Toronto Western Hospital, 399 Bathurst St, Ste 2MC405, Toronto, ON, M5T 2S8, Canada  24 – Phoenix Clinical Research LLC, 7171 N University Dr, Suite 100, Tamarac, FL 33321, USA  25 – Arizona Research Center, 2525 W Greenway Rd, Suite 114, Phoenix, AZ 85023, USA  27 – Ortho Arizona, 1760 E Pecos Rd, #207, Gilbert, AZ 85295, USA  29 – QEII Health Sciences Ctr, 1276 S Park St, Victoria Bldg VG, Halifax, NS, B3H 2Y9, Canada  30 – Peninsula Specialist Centre, Suite 11, 101 George Street, Kippa Ring, QLD 4021, Australia  32 – Sports Medicine Professionals, 21 Erin Street, Richmond, VIC 3121, Australia  33 – Clinical Trials New Zealand, 32 Kahikatea Drive, Hamilton, Waikato 3206, New Zealand  36 – Southern Clinical Trials Ltd, 3 Strickland Street, Beckenham, Christchurch 8024, New Zealand  38 – Holy Spirit Northside Private Hospital, 627 Rode Road, Chermside, QLD 4032, Australia  40 – University of Texas, 6431 Fannin St, MSB 5.020, Houston, TX 77030, USA  41 - Jean Brown Research, 1045 East 3900 South, Suite 100, Salt Lake City, UT 84124, USA  42 – Anaheim Clinical Trials LLC, 1085 N Harbor Blvd, Anaheim, CA 92801, USA  43 – Kingston General Hospital, 76 Stuart St, Victory 2, Kingston, ON, K7L 2V7, Canada  44 – Endeavor Clinical Trials, 8042 Wurzbach, Suite 420, San Antonio, TX 78229, USA  46 – Lotus Clinical Research LLC, 100 W California Blvd, Unit 25, Pasadena, CA 91105, USA |
| --- |
